# Supplementary material
Source: PubMed Central journal article supplement (PMC4629062)
Supplement: NIHMS680642-supplement-Supp_FigureS1-S6.pdf [file NIHMS680642-supplement-Supp_FigureS1-S6.pdf]

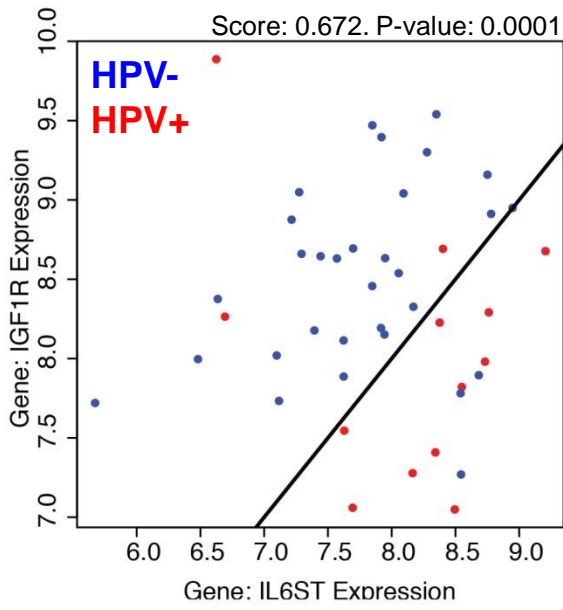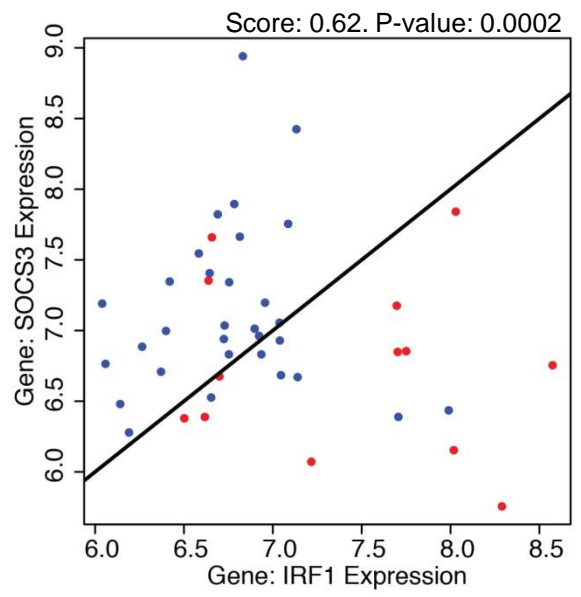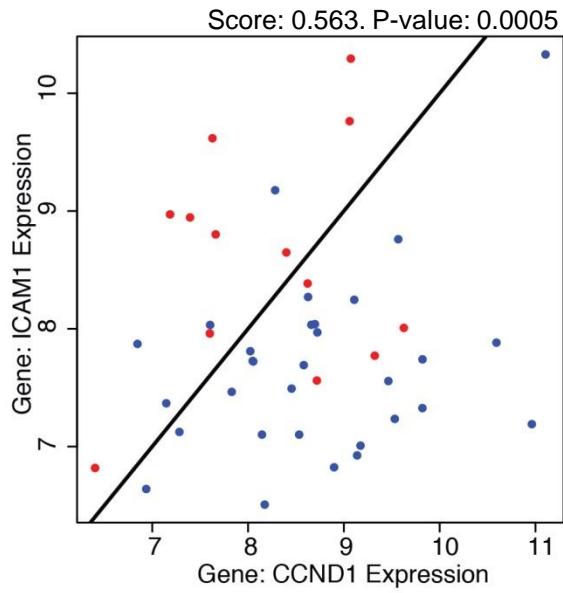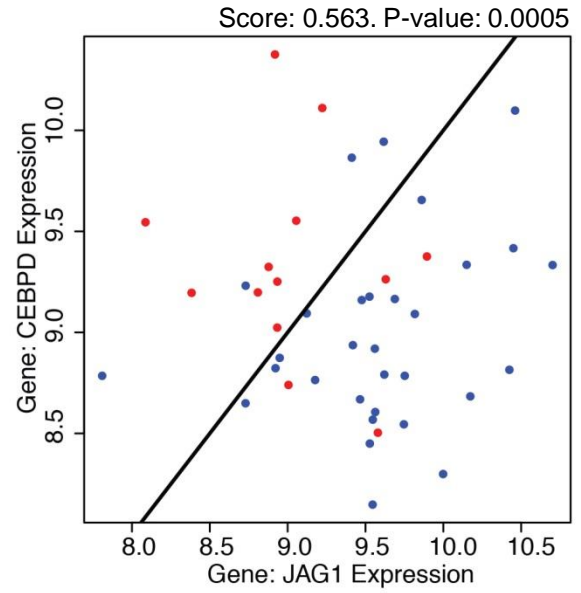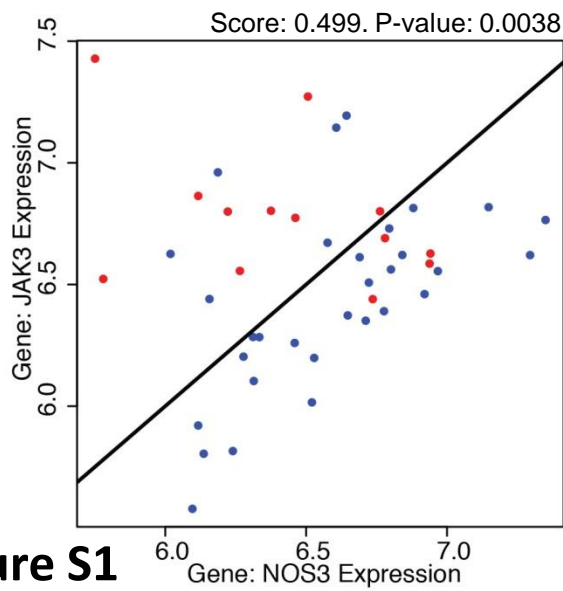

**Figure S1**

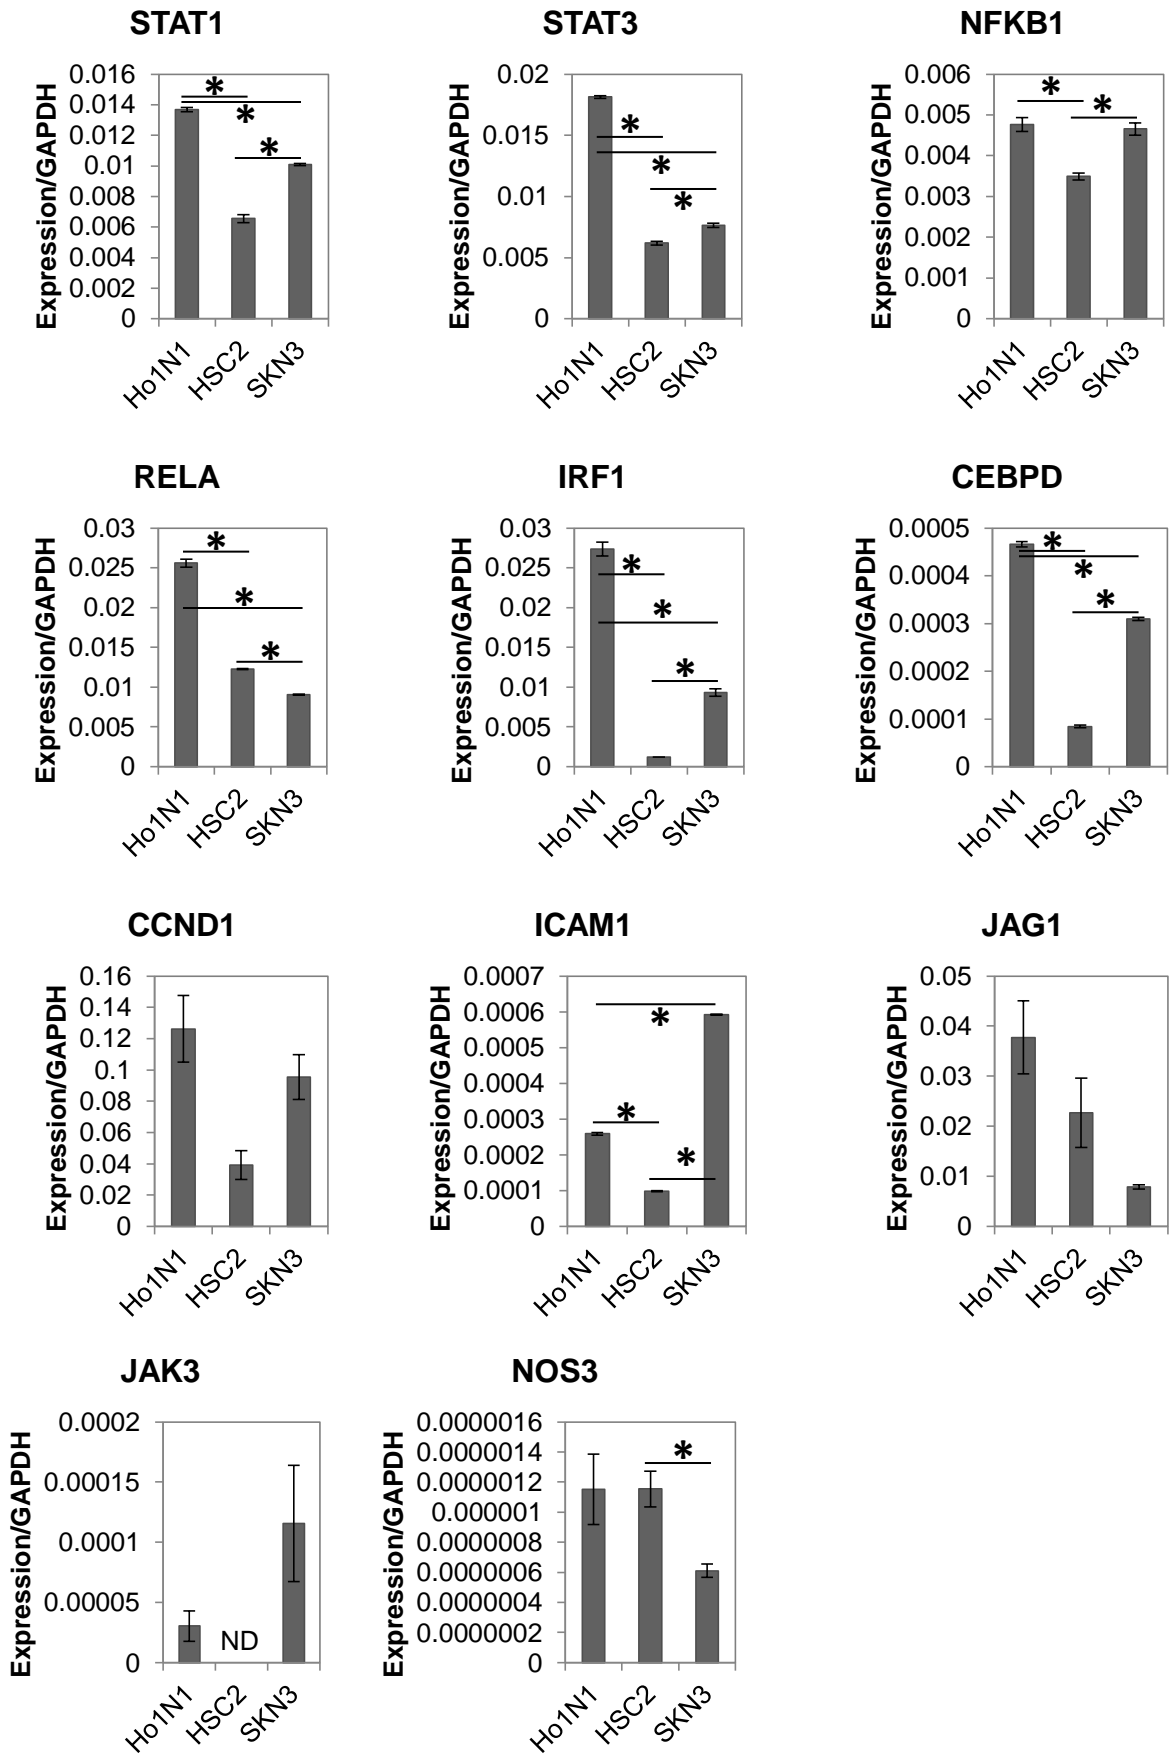

**Figure S2**

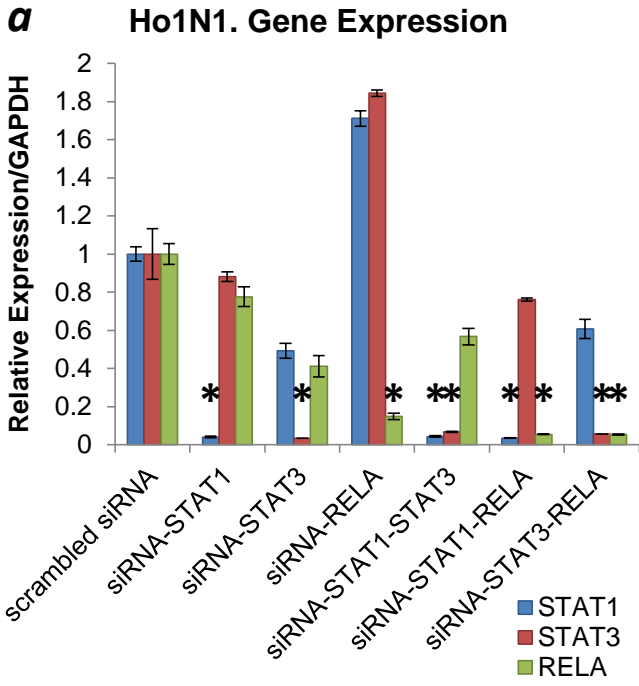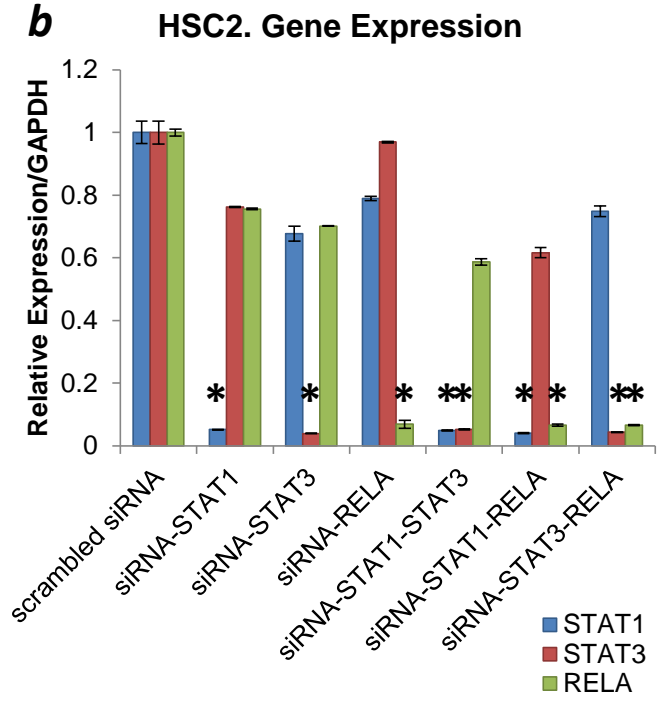

Figure S3

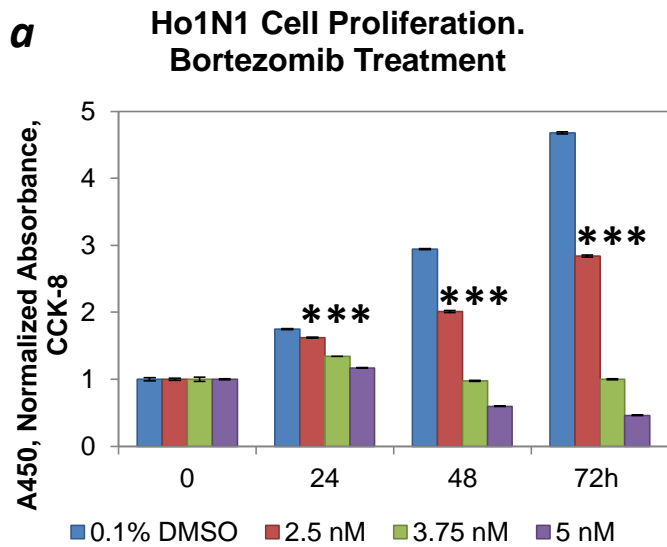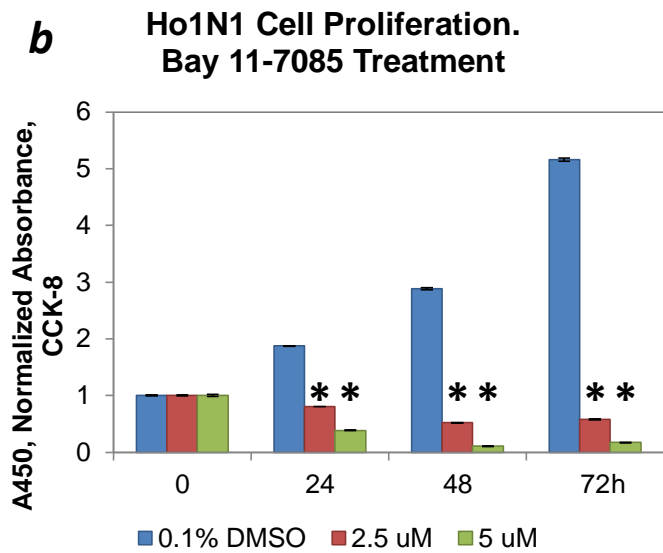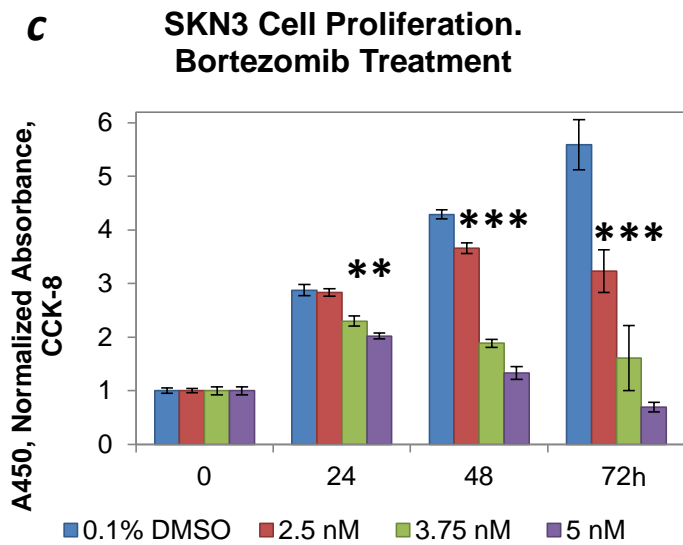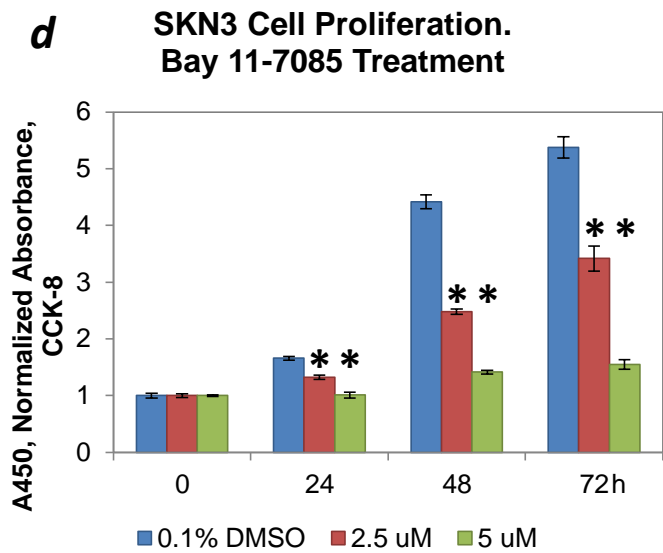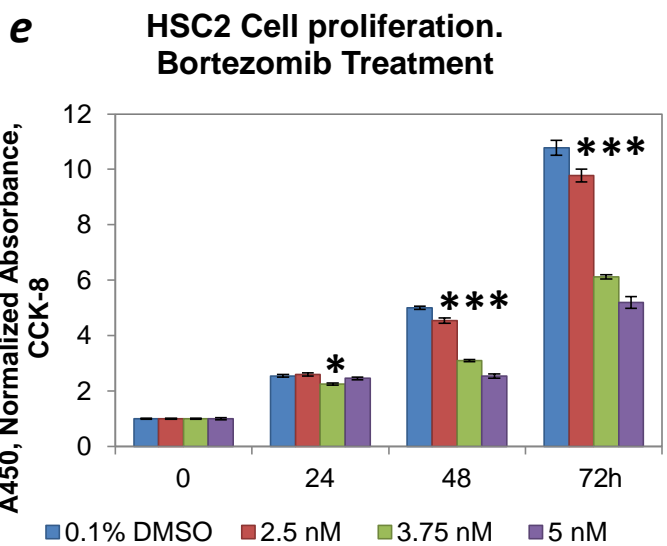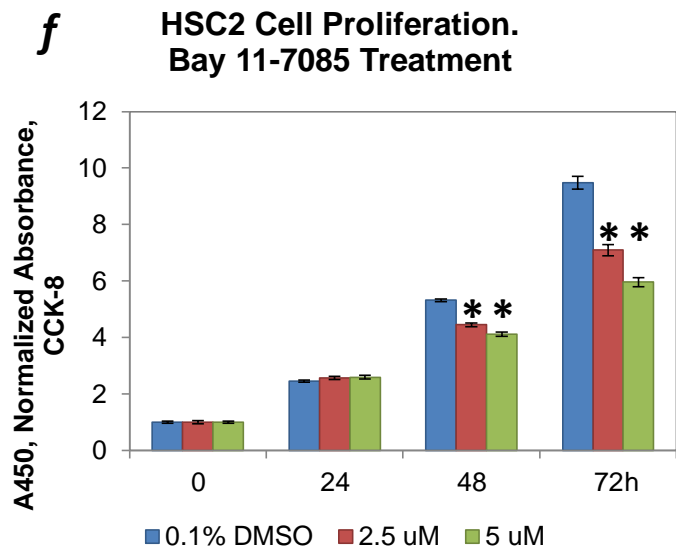

**Figure S4**

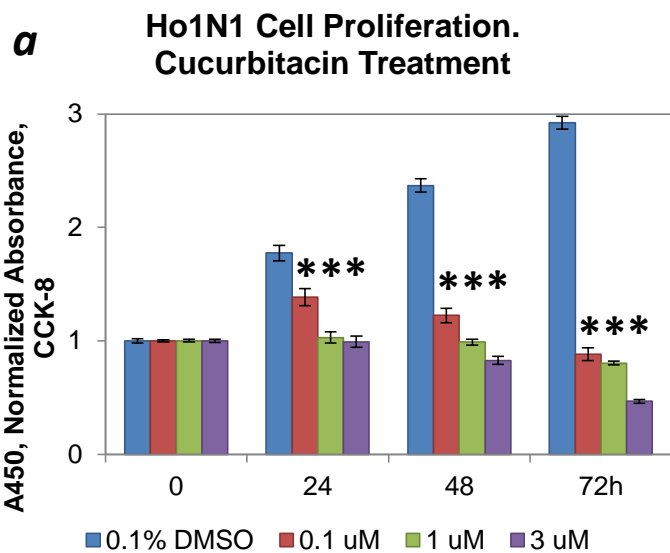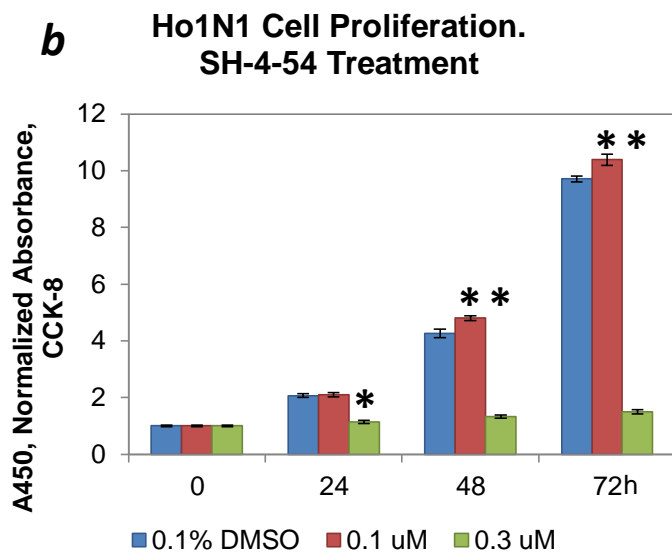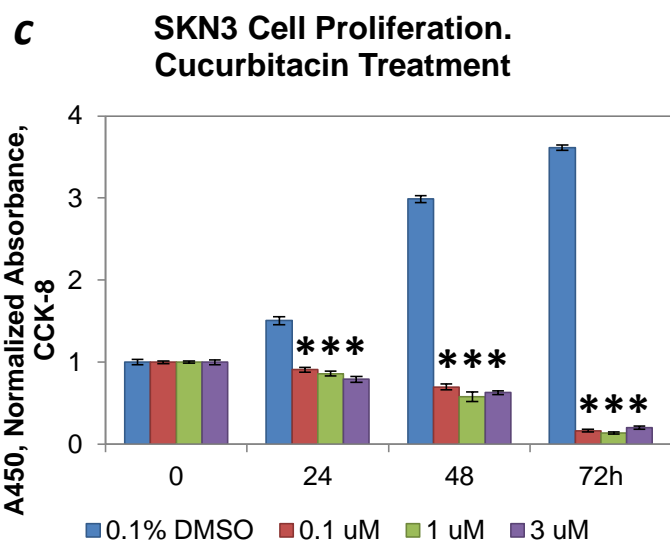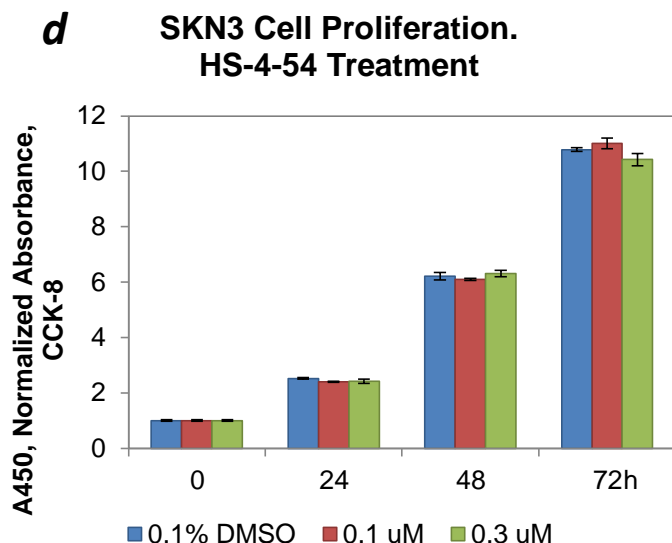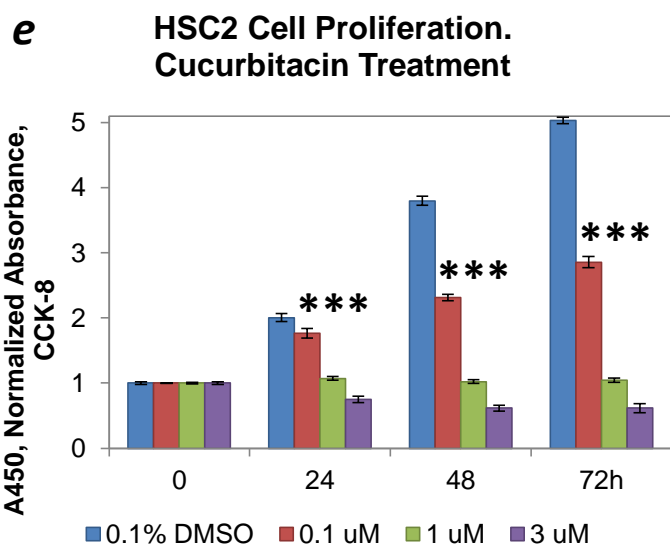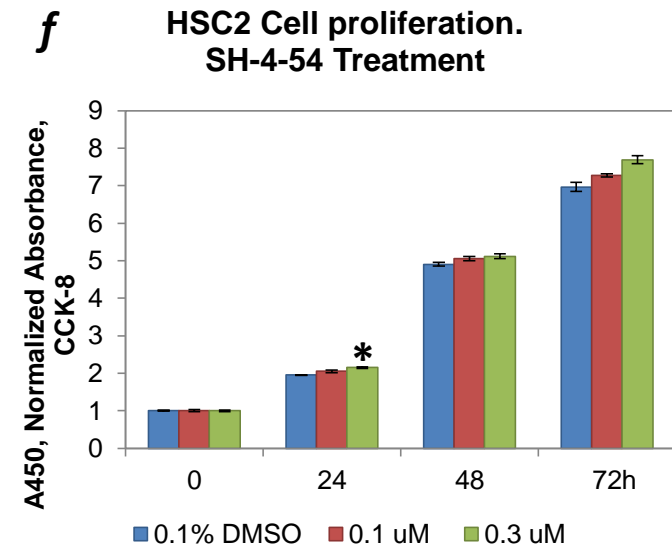

Figure S5

**a** SKN3 Cell Proliferation

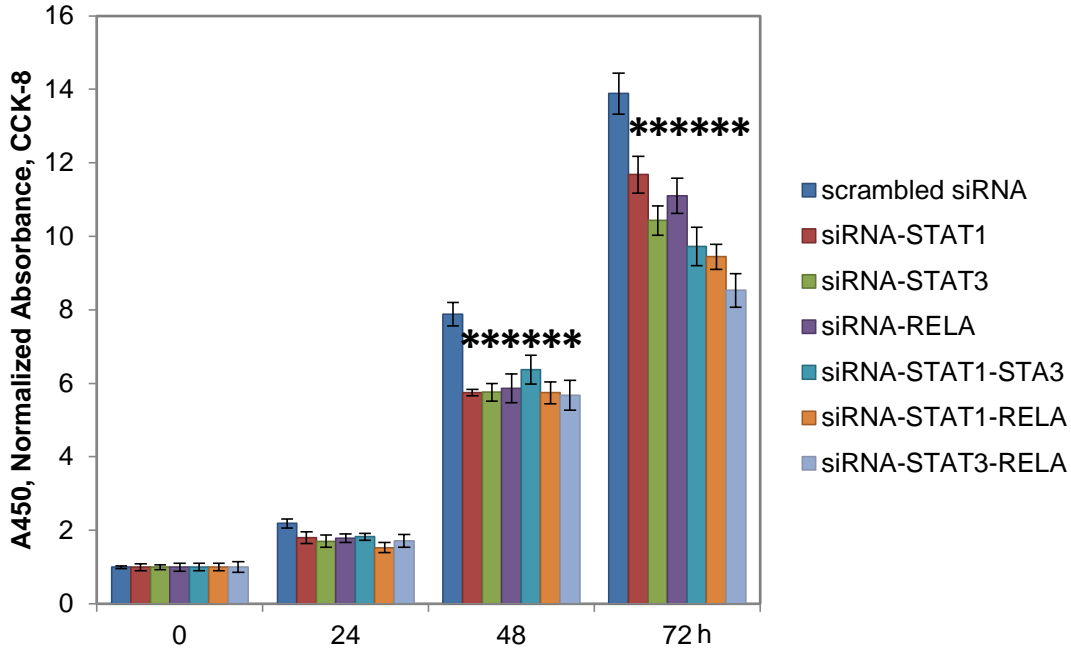

**b** SKN3. Gene Expression

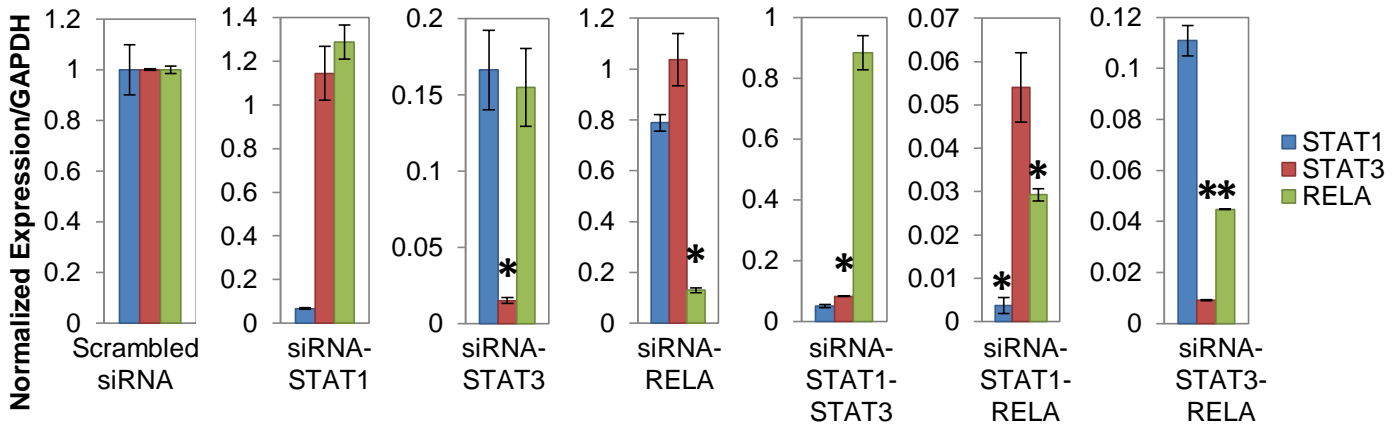

Figure S6
